# Supplementary material for: Agent Competition Double-Auction Mechanism
Source: Atypon-hosted journal article supplement (doi:10.1287/mnsc.1060.0528), 2006-07-28
Supplement: mnsc.1060.0528-sm-chu_shen_8_06_ec1.pdf [file mnsc.1060.0528-sm-chu_shen_8_06_ec1.pdf]

# **Agent Competition Double Auction Mechanism**

Leon Yang Chu  
Zuo-Jun Max Shen

ON LINE APPENDIX

## Online Appendix<sup>9</sup>

### B Analysis of Incentives

We show in this Appendix that the seller competition mechanism is (*ex post*) individually-rational and strategy-proof under Properties 2 and 3. At the end of this section, we conclude that as long as we formulate the social welfare according to a quasi-linear formulation, for example, using formulation  $\mathcal{P}$  for the simple exchange environment, each agent will only face a “take-it-or-leave-it” situation, and the mechanism is both (*ex post*) individually-rational and strategy-proof. Therefore, the quasi-linearity assumption on the agents’ preferences is not required.<sup>10</sup>

Let us first discuss the individually-rational issue. We use  $\tilde{J}$  to denote the set of sellers after the elimination phase and let  $\hat{p}_-(k) = p_-(k)(I, \tilde{J})$ .

**Theorem B.1** *The seller competition mechanism is (ex post) individually-rational.*

Proof: Note that if seller  $k$  trades, his bid  $g_k$  must be no more than  $p_+(k)$  because otherwise he would be eliminated. Since his transaction price is  $p_+(k)$ , which is no less than  $g_k$ , the price he is willing to sell, his utility from participation is non-negative. Because all the non-trading sellers have utility zero, the mechanism is (*ex post*) individually-rational for all the sellers.

If buyer  $l$  trades, she is involved in the efficient allocation of agent set  $I \cup \tilde{J}$ . That is, her bid  $f_l$  must be no less than  $\hat{p}_-(l)$ . Since her transaction price is  $\hat{p}_-(l)$ , which is no more than  $f_l$ , the price she is willing to pay, her utility from participation is non-negative. Because all the non-trading buyers have utility zero, the mechanism is (*ex post*) individually-rational for all the buyers.

Therefore, the mechanism is (*ex post*) individually-rational. ■

To show that the mechanism is strategy-proof, we first show that truth-revelation is a dominant strategy for all the sellers. This is accomplished by the following lemmas.

**Lemma B.2**  $p_+(k) \leq p_-(k)$  for seller  $k \in J$ .

Proof: Consider an exchange environment with one more seller who is identical to  $k$ . By Property 2, we have  $V_k + V_{-k} \leq V + V$ . Thus,  $V_k - V \leq V - V_{-k}$ . Since  $p_+(k)$  and  $p_-(k)$  are the suprema of the

---

<sup>9</sup>We only prove the results for the seller competition mechanism in the appendix, and it is understood that all theorems about the seller competition mechanism also hold, *mutatis mutandis*, for the buyer competition mechanism.

<sup>10</sup>In fact, we can derive other individually-rational and strategy-proof mechanisms by using non-quasi-linear formulations. The proofs will hold as long as the objective function of the new social welfare formulation is an *additive* measure over functions, each of which is a function of an agent’s bid.

bid prices such that  $V_k - V > 0$  and  $V - V_{-k} > 0$ , respectively, we have  $p_+(k) \leq p_-(k)$ . ■

The following lemma implies that if seller  $k \in J' \subset J$  bids  $g_k$ , which is lower than  $p_-(k)(I, J)$  (he is involved in every efficient allocation for agent set  $I \cup J$ ), seller  $k$  is involved in every efficient allocation for agent set  $I \cup J'$ .

**Lemma B.3** *For  $k \in J' \subset J$ ,  $V - V_{-k} \leq V_{-J \setminus J'} - V_{-(J \setminus J') \cup \{k\}}$ .*

Proof: It suffices to prove the result for the case  $|J'| = |J| - 1$ . Suppose  $l$  is the unique element in  $J \setminus J'$ . From Property 2, we have  $V + V_{-\{k,l\}} \leq V_{-k} + V_{-l}$ , i.e.,  $V - V_{-k} \leq V_{-l} - V_{-\{k,l\}}$ . Note if  $g_k < p_-(k)$ , we have  $V > V_{-k}$ . Thus,  $V_{-l} > V_{-\{k,l\}}$ , which means that seller  $k$  is involved in every efficient allocation for agent set  $I \cup J'$ . ■

**Lemma B.4** *If seller  $k$  bids lower than  $p_+(k)$ , he trades his bundle.*

Proof: From Lemma B.2, we know if seller  $k$  bids lower than  $p_+(k)$ , his bid is also lower than  $p_-(k)$ . Note that after the elimination phase, the agent set becomes  $I \cup \tilde{J}$  where  $\tilde{J} \subseteq J$  and  $k \in \tilde{J}$ . By Lemma B.3, seller  $k$  wins in every efficient allocation for agent set  $I \cup \tilde{J}$ . ■

**Theorem B.5** *Each seller has a (weakly) dominant strategy to bid truthfully.*

Proof: Note that  $p_+(k)$  is determined by agent set  $I \cup J \setminus \{k\}$ ; thus, it is independent of the bid price  $g_k$ . Also, if seller  $k$  trades, his revenue is  $p_+(k)$ . Thus, if seller  $k$ 's valuation is higher than  $p_+(k)$ , he prefers not to trade, which can be achieved by bidding his valuation. If seller  $k$ 's valuation is lower than  $p_+(k)$ , he prefers to trade at price  $p_+(k)$ , which can also be achieved by bidding his valuation. If seller  $k$ 's valuation is equal to  $p_+(k)$ , he is indifferent between trading and not trading. Thus, it is a (weakly) dominant strategy for all the sellers to bid truthfully. ■

Now we show that truth-revelation is a dominant strategy for all the buyers. The result builds on the following lemmas. The next lemma implies that if buyer  $k$  bids an amount  $f_k$ , which is higher than  $p_-(k)(I, J')$  for  $J' \subset J$ , buyer  $k$  is involved in every efficient allocation for agent set  $I \cup J$ .

**Lemma B.6** *Given a subset  $J' \subset J$  and a buyer  $k \in I$ ,  $V - V_{-k} \geq V_{-J \setminus J'} - V_{-(J \setminus J') \cup \{k\}}$ .*

Proof: It suffices to prove the result for the case  $|J'| = |J| - 1$ . Suppose  $l$  is the unique element in  $J \setminus J'$ . From Property 3, we have  $V + V_{-\{k,l\}} \geq V_{-k} + V_{-l}$ , or  $V - V_{-k} \geq V_{-l} - V_{-\{k,l\}}$ . Note that

if buyer  $k$  bids an amount  $f_k$ , which is higher than  $p_-(k)(I, J')$ ,  $V_{-l} > V_{-\{k,l\}}$ . Thus,  $V > V_{-l}$  and, buyer  $k$  is involved in every efficient allocation for agent set  $I \cup J$ . ■

**Lemma B.7** *If buyer  $k \in I$  bids an amount  $f_k$ , which is lower than  $p_-(k)$ , then she does not trade in any efficient allocation of agent set  $I \cup J'$ , where  $J' \subset J$ .*

Proof: It suffices to prove the result for the case  $|J'| = |J| - 1$ . Suppose  $l$  is the unique element in  $J \setminus J'$ . We have  $f_k < p_-(k)$  and  $V = V_{-k}$ . From Property 3, we know  $V_{-\{k,l\}} = V_{-l}$  as we always have  $V_{-\{k,l\}} \leq V_{-l}$ . Now suppose buyer  $k$  bids  $p_-(k) - \epsilon > f_k$  instead of  $f_k$  for some small  $\epsilon > 0$ . Then we still have  $V = V_{-k}$  and  $V_{-\{k,l\}} = V_{-l}$  for the new bid. This means that the value of  $V_{-l}$  remains the same, since  $V_{-\{k,l\}}$  is independent of  $k$ 's bid. Thus, buyer  $k$  does not trade in any efficient allocation for agent set  $I \cup J'$ , otherwise  $V_{-l}$  increases as buyer  $k$  increases her bid to  $p_-(k) - \epsilon$ . ■

**Lemma B.8**  *$p_+(l)$  for  $l \in J$  does not increase if one buyer lowers her bid.*

Proof: Since we define  $p_+(l)$  as the supremum of seller  $l$ 's price to make  $V_l > V$ , it suffices to show that  $V_l - V$  does not increase when some buyer  $k$  lowers her bid. Let buyer  $k$  lower her bid continuously. Both  $V_l$  and  $V$  either decrease or remain the same when  $f_k$  decreases. If  $V$  decreases as  $f_k$  decreases, buyer  $k$  is involved in every efficient allocation for agent set  $I \cup J$ . Due to Lemma B.6, if there is one more seller who bids the same price as seller  $l$ 's price, buyer  $k$  still trades; thus,  $V_l$  decreases at the same rate, and  $V_l - V$  does not increase when some buyer  $k$  lowers her bid. ■

Now let us consider the set of remaining sellers in the limit as buyer  $k$ 's bid approaches infinity. This limiting set is well defined by Lemma B.8. Since there are only finitely many possible remaining seller sets, if buyer  $k$  bids high enough, the set of remaining sellers is the limiting set. We use  $\tilde{J}_k$  to denote this limiting remaining seller set and use  $\tilde{p}_-(k)$  to denote  $p_-(k)(I, \tilde{J}_k)$ . We have the following lemma:

**Lemma B.9** *The buyer  $k$  who bids higher than  $\tilde{p}_-(k)$  trades the bundle at price  $\tilde{p}_-(k)$ .*

Proof: We know if buyer  $k$  bids higher than  $\tilde{p}_-(k)$ , she is involved in every efficient allocation for agent set  $I \cup \tilde{J}_k$ . From Lemma B.6, we know that buyer  $k$  is involved in every efficient allocation for  $V(I, J)$  and  $V_l(I, J)$  for any seller  $l \in J$ . Thus,  $V_l - V$  and  $p_+(l)(I, J)$  remain the same, as long as buyer  $k$  bids higher than  $\tilde{p}_-(k)$ . We claim that the set of remaining sellers is  $\tilde{J}_k$  because the set of remaining sellers is  $\tilde{J}_k$  if buyer  $k$  bids high enough. Since buyer  $k$  bids higher than  $\tilde{p}_-(k)$ , she is involved in every

efficient allocation for agent set  $I \cup \tilde{J}_k$ . Therefore, she trades at price  $\tilde{p}_-(k)$ . ■

**Corollary B.10** *The remaining seller set is  $\tilde{J}_k$  as long as buyer  $k$  bids higher than  $\tilde{p}_-(k)$ . Furthermore,  $p_+(j)(I, J)$  remains the same for all  $j \in \tilde{J}_k$ .*

**Theorem B.11** *Each buyer has a (weakly) dominant strategy to bid truthfully.*

Proof: We have already shown that if buyer  $k$  bids higher than  $\tilde{p}_-(k)$ , she trades at price  $\tilde{p}_-(k)$ . Suppose she bids lower than  $\tilde{p}_-(k)$ , then the set of remaining sellers  $\tilde{J}$  becomes a subset of  $\tilde{J}_k$  by Lemma B.8. Furthermore, she does not trade in any efficient allocation for agent set  $I \cup J'$  since she bids lower than  $\tilde{p}_-(k)$  by Lemma B.7. Thus, buyer  $k$  does not trade if she bids lower than  $\tilde{p}_-(k)$ . Now if she bids  $\tilde{p}_-(k)$ , the set of remaining sellers  $\tilde{J}$  is a subset of  $\tilde{J}_k$ , and she may either not trade or trade at price  $\tilde{p}_-(k)$ . Thus, if her valuation of the item is lower than  $\tilde{p}_-(k)$ , she prefers not to trade, which can be achieved by bidding her valuation. If her valuation is higher than  $\tilde{p}_-(k)$ , she prefers to trade at price  $\tilde{p}_-(k)$ , which can also be achieved by bidding her valuation. If her valuation is equal to  $\tilde{p}_-(k)$ , she is indifferent between trading and not trading. Thus, it is a (weakly) dominant strategy for all the buyers to bid truthfully. ■

## C Budget Analysis

We have shown that the seller competition mechanism is (*ex post*) individually-rational and strategy-proof under Properties 2 and 3. We show in this Appendix that the seller competition mechanism is (weakly) budget-balanced with two more additional conditions, Property 1 and a quasi-linear social welfare function.

Since  $\tilde{J} \subseteq J$ ,  $p_+(j)(I, J) \leq \tilde{p}_+(j)$  by Lemma B.3, that is, no seller is eliminated if the auction starts with agent set  $I \cup \tilde{J}$ . Note that the trading prices for the buyers remain the same, while the trading prices of the sellers increase from  $p_+(j)(I, J)$ s to  $\tilde{p}_+(j)$ s, and the auctioneer's revenue does not increase. Thus, it suffices to prove the budget balance result only for the special case  $J = \tilde{J}$ . Note that in such an environment, the allocation determined by our mechanism is efficient.

The following lemma implies that if buyer  $k \in I' \subset I$  bids  $f_k$ , which is higher than  $p_-(k)(I, J)$  (she is involved in every efficient allocation for agent set  $I \cup J$ ), buyer  $k$  is involved in every efficient allocation for agent set  $I' \cup J$ .

**Lemma C.1** *For buyer  $k \in I' \subset I$ ,  $V - V_{-k} \leq V_{-I \setminus I'} - V_{-(I \setminus I') \cup \{k\}}$ .*

Proof: Similar to the proof of Lemma B.3, except that we apply Property 1 instead of Property 2. ■

**Lemma C.2** *Suppose buyer  $k$  bids  $f_k > p_-(k)(I, J)$ , and she lowers her bid to  $p_-(k)(I, J) + \epsilon_k$  ( $\epsilon_k > 0$ ), then i) the set of remaining sellers and  $p_+(j)(I, J)$  for seller  $j \in J$  do not change; ii) for buyer  $i$  with  $f_i > p_-(i)(I, J)$ ,  $p_-(i)(I, J)$  does not change; iii) the original efficient allocation is still efficient.*

Proof: i) Since  $J = \tilde{J}$ , this is just a restatement of Corollary B.10.

To prove ii), note that since  $f_k > \tilde{p}_-(k)$ , buyer  $k$  is involved in every efficient allocation for agent set  $I \cup J = I \cup \tilde{J}$ . By Lemma C.1, she is also involved in every efficient allocation for agent set  $I \cup J = I \cup \tilde{J} \setminus \{i\}$  for  $i \in I$  and  $i \neq k$ . As buyer  $k$  lowers her bid, both  $V$  and  $V_{-i}$  change by the same amount,  $p_-(i)(I, J)$  of buyer  $i$ , who bids higher than original  $p_-(i)(I, J)$ , remains unchanged.

For iii), since bidding higher than  $p_-(k)(I, J)$  guarantees that buyer  $k$  is involved in every efficient allocation for agent set  $I \cup J$ , the decrease of social welfare is determined by the amount of bid decrease. Thus, iii) follows. ■

**Lemma C.3** *Suppose seller  $k$  bids  $g_k$ , which is less than  $\tilde{p}_-(k)$ , and he raises his bid to  $\tilde{p}_-(k) - \epsilon_k$  ( $\epsilon_k > 0$ ). Then i) for trading seller  $j$  ( $\neq k$ ),  $p_+(j)(I, J)$  does not change; ii) the original efficient allocation is still efficient.*

Proof: i) If seller  $k$  changes his bid to  $p_+(k)(I, J) - \epsilon_k$ ,  $V$  decreases, and  $V_j$  decreases by at most the same amount for any other seller  $j \in J$ . Thus,  $p_+(j)(I, J)$  for seller  $j \in J$  does not decrease, and no seller is eliminated after this change.

For ii), since bidding lower than  $p_+(k)(I, J)$  guarantees that seller  $k$  is involved in every efficient allocation, the social welfare decreases according to the amount changed in the bid. Thus, ii) follows. ■

We denote the trading buyer set as  $\hat{I}$  and the trading seller set as  $\hat{J}$ . We now prove the main theorem for budget balance. Recall that we have  $J = \tilde{J}$ .

**Theorem C.4** *The seller competition mechanism is (weakly) budget-balanced.*

Proof: Suppose we let all trading buyers who bid higher than  $p_-(k)(I, J)$  lower their bids to  $p_-(k)(I, J) + \epsilon_k$  (for some  $\epsilon_k > 0$ ) one by one. Then by Lemma C.2, the original allocation remains efficient and  $p_+(j)(I, J)$  remains the same for seller  $j \in J$ . After that, by Lemma C.3, we can let all of the trading sellers who bid lower than  $p_+(k)(I, J)$  raise their bids to  $p_+(k)(I, J) - \epsilon_k$  (for some

$\epsilon_k > 0$ ) one by one and still keep the original allocation efficient. Since the original allocation is still efficient, it is better than making no transaction. Under quasi-linear social welfare function, we have  $\sum_{i \in \tilde{I}} (p_-(i)(I, J) + \epsilon_i) - \sum_{j \in \tilde{J}} (p_+(j)(I, J) - \epsilon_j) - C(Q) \geq 0$ , where  $C(Q)$  is the transaction costs to execute the allocation  $Q$ . Since the  $\epsilon_k$ s are arbitrary positive numbers and  $J = \tilde{J}$ ,  $\sum_{i \in \tilde{I}} \tilde{p}_-(i) \geq \sum_{j \in \tilde{J}} p_+(j)(I, J) + C(Q)$ , i.e., the total cash inflow is no less than the total cash outflow. Thus, the seller competition mechanism is (weakly) budget-balanced. ■
